# Supplementary material for: High-Performance Sustainable Tissue Paper from Agricultural Residue: A Case Study on Fique Fibers from Colombia
Source: Research Square preprint supplement (doi:10.21203/rs.3.rs-1330879/v1), 2022-02-16
Supplement: Supplementary file 1 [file 045ef7ec5bf54e7864007267.docx]

**High-Performance Sustainable Tissue Paper from Agricultural Residue: A Case Study on Fique Fibers from Colombia**

**Rajnish Kumar, Franklin Zambrano, Ilona Peszlen, Richard Venditti, Joel Pawlak, Hasan Jameel, Ronalds Gonzalez***

Tissue Pack Innovation Lab, Department of Forest Biomaterials, North Carolina State University, Raleigh, North Carolina, USA, 27695-8005

(*) *Corresponding author: R. Gonzalez (*[rwgonzal@ncsu.edu](mailto:rwgonzal@ncsu.edu))

### Zero Span Tensile Strength

**Figure A 1**. Zero span tensile strength (expressed as breaking length) of fique residue and NBSK pup measured at different pulp freeness. Error bars represent one standard deviation.

### Tensile stiffness of individual pulps

**Figure A 2.** Tensile stiffness of fique residue bleached pulp and NBSK pulp at different pulp freeness. Tensile stiffness was measured from the stress-strain curve generated during the tensile testing by the Instron. Error bars represent one standard deviation.

### Surface Smoothness/Roughness (TS750) of Individual Pulps

**Figure A 3**. Surface smoothness/roughness (TS750) of individual pulps plotted against the tensile index of tissue handsheets. A lower value represents smoother surface. Error bars represent one standard deviation

### Surface Smoothness/Roughness (TS750) of pulp blends

**Figure A 4.** Surface smoothness/roughness (TS750) of pulp blends plotted against the tensile index of tissue handsheets. A lower value represents smoother surface. Error bars represent one standard deviation.
